# Supplementary material
Source: PubMed Central journal article supplement (PMC7313236)
Supplement: NIHMS1600436-supplement-Supporting_Information.pdf [file NIHMS1600436-supplement-Supporting_Information.pdf]

## Supporting Information

*Margaret M. Billingsley<sup>1</sup>, Nathan Singh<sup>2,3</sup>, Pranali Ravikumar<sup>2</sup>, Rui Zhang<sup>1</sup>, Carl H. June<sup>4,5</sup>, and Michael J. Mitchell<sup>1,4,6,7,8#</sup>*

<sup>1</sup>Department of Bioengineering, University of Pennsylvania, Philadelphia, Pennsylvania 19104, United States

<sup>2</sup>Division of Oncology, Department of Medicine, Perelman School of Medicine, University of Pennsylvania, Philadelphia, Pennsylvania 19104, United States

<sup>3</sup>Division of Oncology, Section of Stem Cell Biology, Department of Medicine, Washington University School of Medicine, St. Louis, Missouri 63110, United States

<sup>4</sup>Abramson Cancer Center, Perelman School of Medicine, University of Pennsylvania, Philadelphia, Pennsylvania 19104, United States

<sup>5</sup> Department of Pathology and Laboratory Medicine, Perelman School of Medicine, University of Pennsylvania, Philadelphia, Pennsylvania 19104, United States

<sup>6</sup> Institute for Immunology, Perelman School of Medicine, University of Pennsylvania, Philadelphia, PA, USA

<sup>7</sup> Cardiovascular Institute, Perelman School of Medicine, University of Pennsylvania, Philadelphia, Pennsylvania, USA

<sup>8</sup> Institute for Regenerative Medicine, Perelman School of Medicine, University of Pennsylvania, Philadelphia, Pennsylvania, USA

<sup>#</sup>To whom correspondence should be addressed: [mjmitch@seas.upenn.edu](mailto:mjmitch@seas.upenn.edu)

| Amine Core (#) | Name                                                                                                                      | Structure |
|----------------|---------------------------------------------------------------------------------------------------------------------------|-----------|
| 1              | 3-[4-(3-([2-(4-[3-[4-(3-aminopropyl)piperazin-1-yl]propyl)piperazin-1-yl)ethyl]amino)propyl)piperazin-1-yl]propan-1-amine |           |
| 2              | {2-[2-(2-aminoethoxy)ethoxy]ethyl}[2-(4-[2-[2-(2-aminoethoxy)ethoxy]ethyl)piperazin-1-yl]ethyl]amine                      |           |
| 3              | 10-(4-[2-[(10-aminodecyl)amino]ethyl]piperazin-1-yl)decan-1-amine                                                         |           |
| 4              | 2-[2-[4-(2-[2-(2-aminoethoxy)ethyl]amino)ethyl]piperazin-1-yl]ethoxy]ethan-1-amine                                        |           |
| 5              | 1-[4-(3-[2-[2-(3-aminopropoxy)ethoxy]ethoxy]propyl)piperazin-1-yl]-7,10,13-trioxa-3-azahexadecan-16-amine                 |           |
| 6              | 3-(4-[2-[(3-amino-2-ethoxypropyl)amino]ethyl]piperazin-1-yl)-2-ethoxypropan-1-amine                                       |           |
| 7              | [1-([2-(4-[1 (aminomethyl) cyclohexyl]methyl)piperazin-1-yl) ethyl] amino)methyl]cyclohexyl]methanamine                   |           |
| 8              | 1-N-[2-[4-(4-aminocyclohexyl)piperazin-1-yl]ethyl]cyclohexane-1,4-diamine                                                 |           |

Table S1. Amine Cores. The named structures of the amine cores used to generate the ionizable lipid library.

| <b>Formulation</b> | <b>Diameter (nm)</b> | <b>PDI</b>  | <b>Luciferase mRNA (ng/uL)</b> |
|--------------------|----------------------|-------------|--------------------------------|
| <b>C12-1</b>       | 68.85 ± 1.07         | .094 ± .007 | 40.25 ± 0.07                   |
| <b>C12-2</b>       | 82.92 ± 1.21         | .238 ± .006 | 38.65 ± 0.78                   |
| <b>C12-3</b>       | 51.22 ± 0.66         | .158 ± .013 | 45.8 ± 0.28                    |
| <b>C12-4</b>       | 51.05 ± 2.75         | .219 ± .015 | 36.25 ± 1.20                   |
| <b>C12-5</b>       | 65.6 ± 1.13          | .203 ± .015 | 37.05 ± 0.21                   |
| <b>C12-6</b>       | 91.79 ± 1.17         | .115 ± .018 | 39.8 ± 1.13                    |
| <b>C12-7</b>       | 64.73 ± 2.88         | .219 ± .021 | 37.55 ± 0.07                   |
| <b>C12-8</b>       | 70.25 ± 0.75         | .086 ± .003 | 47.55 ± 0.49                   |
| <b>C14-1</b>       | 73.15 ± 2.23         | .176 ± .052 | 34.3 ± 0.85                    |
| <b>C14-2</b>       | 75.61 ± 1.21         | .179 ± .136 | 35.25 ± 0.35                   |
| <b>C14-3</b>       | 74.09 ± 0.35         | .238 ± .009 | 40.4 ± 1.13                    |
| <b>C14-4</b>       | 70.17 ± 0.41         | .176 ± .006 | 35.6 ± 2.12                    |
| <b>C14-5</b>       | 64.57 ± 3.10         | .232 ± .007 | 34.25 ± 0.49                   |
| <b>C14-6</b>       | 64.71 ± 1.73         | .129 ± .020 | 36.8 ± 2.12                    |
| <b>C14-7</b>       | 67.14 ± 1.81         | .175 ± .027 | 39.7 ± 1.56                    |
| <b>C14-8</b>       | 65.44 ± 0.51         | .091 ± .004 | 40.3 ± 2.40                    |
| <b>C16-1</b>       | 83.82 ± 3.16         | .029 ± .014 | 46.85 ± 0.50                   |
| <b>C16-2</b>       | 97.01 ± 2.57         | .14 ± .023  | 36.1 ± 0.99                    |
| <b>C16-3</b>       | 82.72 ± 2.32         | .113 ± .010 | 40.3 ± 1.84                    |
| <b>C16-4</b>       | 68.12 ± 1.41         | .211 ± .009 | 38 ± 1.27                      |
| <b>C16-5</b>       | 75.82 ± 0.91         | .284 ± .029 | 35.95 ± 0.64                   |
| <b>C16-6</b>       | 96.03 ± 1.95         | .053 ± .031 | 37.35 ± 0.21                   |
| <b>C16-7</b>       | 89.46 ± 0.59         | .188 ± .009 | 33.3 ± 4.67                    |
| <b>C16-8</b>       | 87.7 ± 0.33          | .101 ± .004 | 48.3 ± 0.85                    |

Table S2: Library Characterization. The diameter (z-average), PDI, and mRNA concentration of each LNP formulation showing a narrow range in LNP size, monodispersity, and similar mRNA loading across LNP formulations. (± standard deviation)

| <b>C14-4 LNP (luciferase mRNA)</b> | <b>Crude</b>     | <b>Purified</b>  |
|------------------------------------|------------------|------------------|
| mRNA (ng/uL) $\pm$ St. Dev.        | 35.6 $\pm$ 2.12  | 29.8 $\pm$ 2.31  |
| Encapsulation Efficiency (%)       | 92.53            | 86.3             |
| Diameter (nm) $\pm$ St. Dev.       | 70.17 $\pm$ 0.41 | 65.19 $\pm$ 0.83 |
| Polydispersity $\pm$ St. Dev.      | .176 $\pm$ .006  | .189 $\pm$ .014  |
| pKa                                | 6.143            | 6.505            |

Table S3: Crude and Purified C14-4 LNPs. Comparison of characteristics of crude and purified C14-4 LNPs encapsulating luciferase mRNA.

A

| Lipid | pKa    |
|-------|--------|
| C12-1 | 7.054  |
| C12-2 | 6.589  |
| C12-3 | 6.52   |
| C12-4 | 6.655  |
| C12-5 | 5.771  |
| C12-6 | 6.026  |
| C12-7 | 6.758  |
| C12-8 | 5.706  |
| C14-1 | 7.049  |
| C14-2 | 5.543  |
| C14-3 | 5.782  |
| C14-4 | 5.889  |
| C14-5 | 6.596  |
| C14-6 | 5.993  |
| C14-7 | 7.317  |
| C14-8 | 7.406  |
| C16-1 | 6.261  |
| C16-2 | 4.597  |
| C16-3 | 6.2228 |
| C16-4 | 5.61   |
| C16-5 | 6.103  |
| C16-6 | 5.671  |
| C16-7 | 6.457  |
| C16-8 | 4.622  |

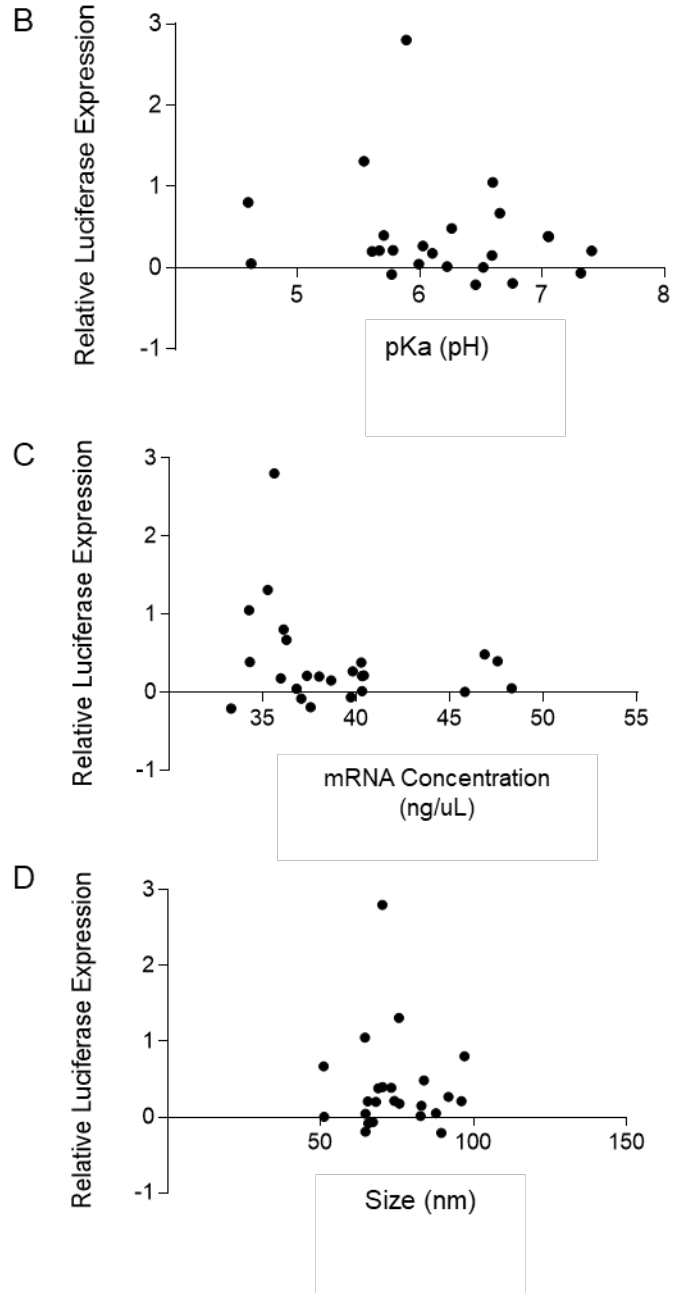

**Figure S1.** (A) Table of the polyamine cores and their pKa values as determined via TNS assay. (B-D) The relative luciferase expression produced by each LNP formulation (at 30 ng/ 60,000 Jurkat cells) graphed against the polyamine core pKa, LNP mRNA concentration, and LNP size, respectively. No correlations between these factors were found.

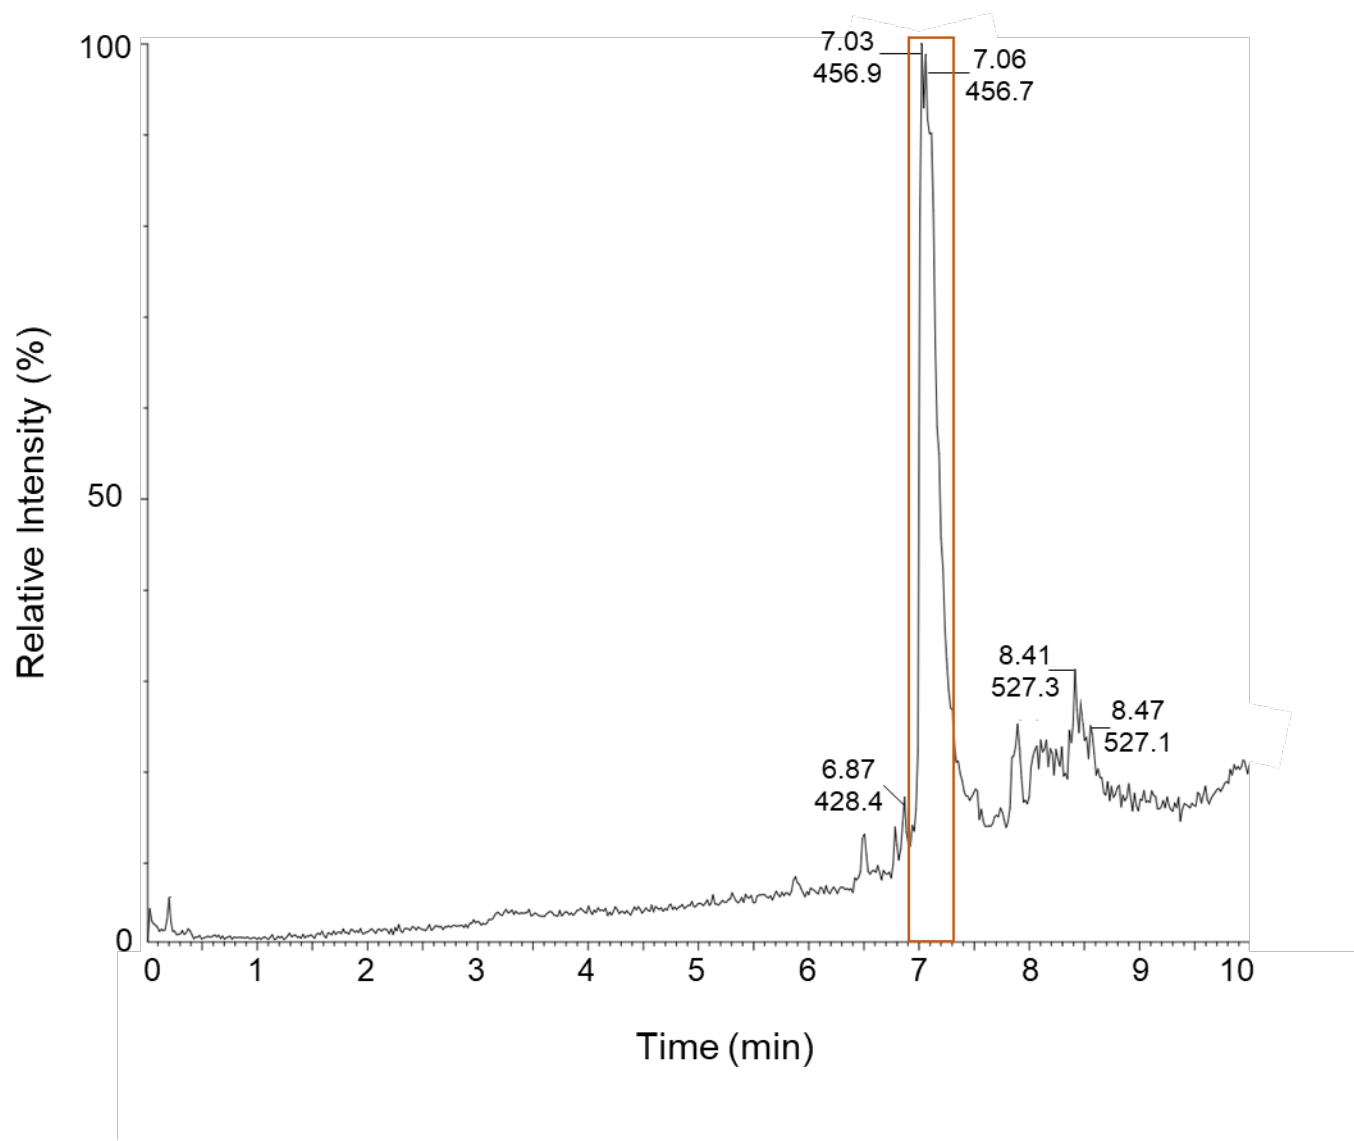

**Figure S2.** LCMS spectra of the crude C14-4 product with the fully saturated amine core highlighted with in the orange box.

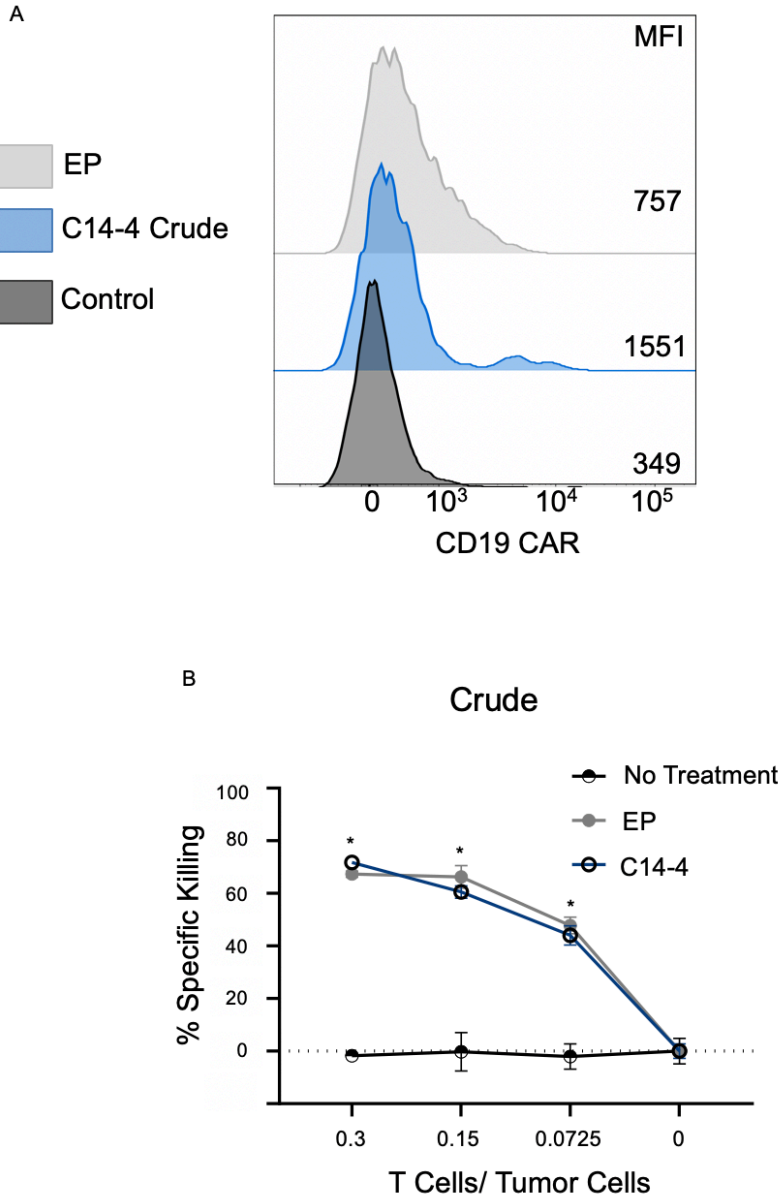

**Figure S3.** (A) Surface expression of CAR on primary T cells assessed using flow cytometry (B) Results of Nalm6 and CAR T cell co-plating at different effector-to-target ratios for 48 hrs. n=3 wells. \* = p<.0001 in paired t test to No Treatment (for both EP and C14-4 LNPs)
